# Supplementary material for: The Catechins Profile of Green Tea Extracts Affects the Antioxidant Activity and Degradation of Catechins in DHA-Rich Oil
Source: MDPI journal article supplement (doi:10.3390/antiox11091844), 2022-09-19
Supplement: s1 [file s1]

# Supplementary materials

## The Catechins Profile of Green Tea Extracts Affects the Antioxidant Activity and Degradation of Catechins in DHA-Rich Oil

Caroline Waingeh Nain<sup>1</sup>, Eric Mignolet<sup>1</sup>, Marie-France Herent<sup>2</sup>, Joëlle Quetin-Leclercq<sup>2</sup>, Cathy Debier<sup>1</sup>, Melissa M Page<sup>1</sup> and Yvan Larondelle<sup>1\*</sup>

<sup>1</sup> Louvain Institute of Biomolecular Science and Technology, UCLouvain, Croix du Sud, 4-5, L7.07.03, B-1348 Louvain-la-Neuve, Belgium

<sup>2</sup> Louvain Drug Research Institute, UCLouvain, Avenue Emmanuel Mounier, 72 bte B1.72.03, B-1200 Brussels, Belgium

\* Correspondence: yvan.larondelle@uclouvain.be.

**Table S1:** Changes in the concentration (µg/g) of catechins in DHA-rich oil supplemented with green tea extracts, catechins mixtures or individual catechins during storage at 30°C for 21 days.

| Treatment |         | The concentration of catechins (µg/g oil) |             |            |             |             |              |
|-----------|---------|-------------------------------------------|-------------|------------|-------------|-------------|--------------|
|           |         | Storage day                               | EGC         | EC         | EGCG        | ECG         | Total        |
| GTE1      | Added   |                                           | 147.2       | 20         | 76.4        | 10          | 253.6        |
|           |         | 0                                         | 146.2 ± 7.6 | 20.5 ± 2.0 | 57.9 ± 4.2  | 6.6 ± 0.5   | 231.1 ± 13.4 |
|           | 14      | 62.9 ± 4.1                                | 17.0 ± 0.8  | 23.3 ± 1.4 | 4.6 ± 0.1   | 107.9 ± 6.0 |              |
|           | 21      | 39.3 ± 1.1                                | 13.0 ± 0.6  | 12.6 ± 0.6 | 3.2 ± 0.1   | 68.1 ± 2.4  |              |
|           | CatMix1 | Added                                     |             | 145.8      | 20          | 75          | 10           |
| 0         |         |                                           | 107.6 ± 6.2 | 17.7 ± 1.0 | 47.9 ± 2.2  | 7.6 ± 0.3   | 180.8 ± 9.6  |
| 14        |         | 37.3 ± 1.4                                | 15.4 ± 0.2  | 14.0 ± 0.5 | 5.9 ± 0.2   | 72.6 ± 1.8  |              |
| 21        |         | 10.4 ± 2.8                                | 10.4 ± 0.5  | 4.3 ± 0.9  | 4.3 ± 0.2   | 29.4 ± 4.4  |              |
| GTE2      |         | Added                                     |             | 44.6       | 24.6        | 152.5       | 29.8         |
|           | 0       |                                           | 38.3 ± 1.1  | 22.4 ± 0.3 | 132.2 ± 4.5 | 24.4 ± 0.9  | 217.3 ± 6.5  |
|           | 14      | 17.6 ± 0.7                                | 17.5 ± 0.6  | 37.9 ± 1.1 | 14.9 ± 0.2  | 88.0 ± 1.3  |              |
|           | 21      | 6.3 ± 0.8                                 | 10.1 ± 0.4  | 2.2 ± 0.6  | 6.6 ± 0.3   | 25.2 ± 1.8  |              |
|           | CatMix2 | Added                                     |             | 44.6       | 24.6        | 152.4       | 29.8         |
| 0         |         |                                           | 35.6 ± 1.0  | 22.7 ± 0.6 | 101.8 ± 4.2 | 21.2 ± 0.7  | 181.2 ± 6.4  |
| 14        |         | 12.2 ± 0.2                                | 18.3 ± 0.5  | 18.9 ± 1.8 | 11.7 ± 0.3  | 61.1 ± 2.6  |              |
| 21        |         | 0.7 ± 0.2                                 | 9.9 ± 0.3   | 1.3 ± 0.1  | 4.0 ± 0.1   | 15.9 ± 0.4  |              |
| EGC250    |         | Added                                     |             | 250.0      |             |             |              |
|           | 0       |                                           | 203.4 ± 2.1 | -          | -           | -           | 203.4 ± 2.1  |
|           | 14      | 105.6 ± 3.4                               | -           | -          | -           | 105.6 ± 3.4 |              |
|           | 21      | 35.1 ± 3.9                                | -           | -          | -           | 35.1 ± 3.9  |              |

|         |              |    |              |              |              |              |
|---------|--------------|----|--------------|--------------|--------------|--------------|
| EC250   | <b>Added</b> | -  | <b>250.0</b> | -            | -            | <b>250.0</b> |
|         | Extracted    | 0  | 220.6 ± 1.1  | -            | -            | 220.6 ± 1.1  |
|         |              | 7  | 80.9 ± 1.5   | -            | -            | 80.9 ± 1.5   |
|         |              | 14 | 12.4 ± 2.0   | -            | -            | 12.4 ± 2.0   |
|         |              | 21 | 0.4 ± 0.01   | -            | -            | 0.4 ± 0.01   |
| EGCG250 | <b>Added</b> | -  | -            | <b>250.0</b> | -            | <b>250.0</b> |
|         | Extracted    | 0  | -            | 179.9 ± 3.4  | -            | 179.9 ± 3.4  |
|         |              | 7  | -            | 74.6 ± 3.1   | -            | 74.6 ± 3.1   |
|         |              | 14 | -            | 26.0 ± 1.9   | -            | 26.0 ± 1.9   |
|         |              | 21 | -            | 0.3 ± 0.02   | -            | 0.3 ± 0.02   |
| ECG250  | <b>Added</b> | -  | -            | -            | <b>250.0</b> | <b>250.0</b> |
|         | Extracted    | 0  | -            | -            | 175.3 ± 8    | 175.3 ± 8    |
|         |              | 7  | -            | -            | 16.3 ± 1.0   | 16.3 ± 1.0   |
|         |              | 14 | -            | -            | 2.4 ± 0.03   | 2.4 ± 0.03   |
|         |              | 21 | -            | -            | 0.2 ± 0.1    | 0.2 ± 0.1    |

EGC = epigallocatechin, EC = epicatechin, EGCG = epigallocatechin gallate, ECG = epicatechin gallate. Control = DHA-rich oil, GTE1 = DHA-rich oil + 1000 ppm GTE1, GTE2 = DHA-rich oil + 450 ppm GTE2, CatMix1 = DHA-rich oil + reconstituted catechins mixture of GTE1, CatMix2 = DHA-rich oil + reconstituted catechins mixture of GTE2, EGC250 = DHA-rich oil + 250 ppm EGC, EC250 = DHA-rich oil + 250 ppm EC, EGCG250 = DHA-rich oil + 250 ppm EGCG, ECG250 = DHA-rich oil + 250 ppm ECG.

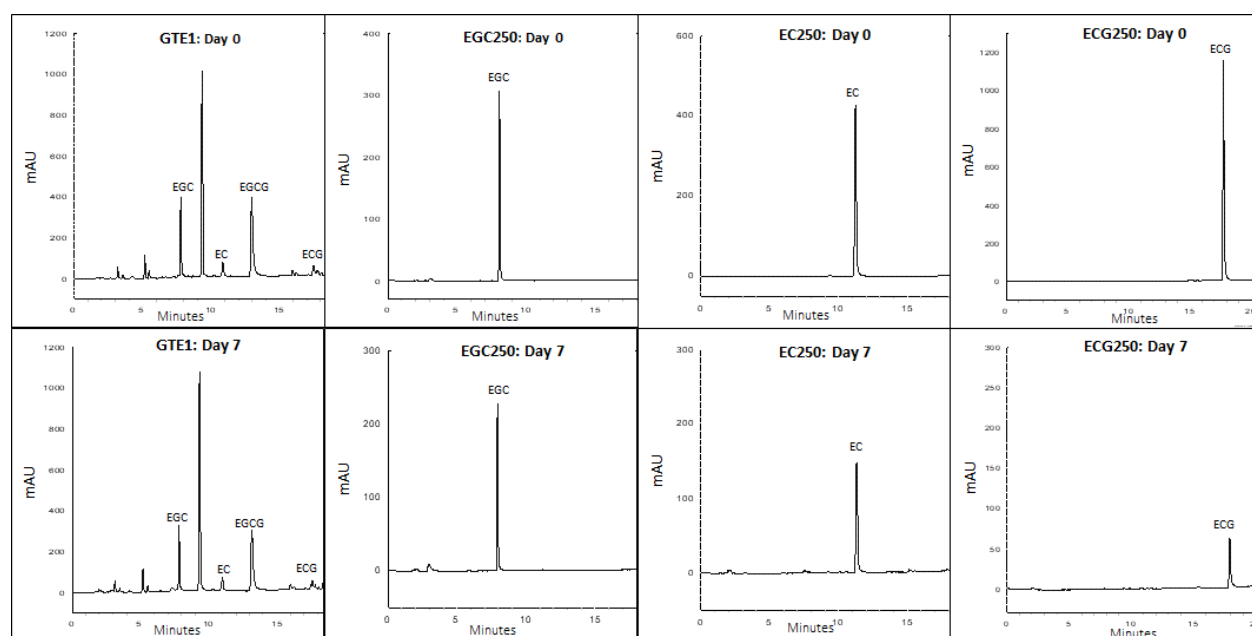

**Figure S1.** HPLC-UV chromatograms of catechins extracted from DHA-rich oils supplemented with GTE or catechins during accelerated ageing at 30°C. EGC = epigallocatechin, EC = epicatechin, EGCG = epigallocatechin gallate, ECG = epicatechin gallate. GTE1 = DHA-rich oil + 1000 ppm GTE1, EGC250 = DHA-rich oil + 250 ppm EGC, EC250 = DHA-rich oil + 250 ppm EC, ECG250 = DHA-rich oil + 250 ppm ECG. The degradation product at a retention time of 7.65 min was not detected in these samples.
